# Supplementary material for: Carbon-based artificial SEI layers for aqueous lithium-ion battery anodes
Source: Royal Society of Chemistry journal article supplement (doi:10.1039/c9ra08268a), 2020-01-01
Supplement: c9ra08268a1.pdf [file c9ra08268a1.pdf]

Supporting information for

# Carbon-based Artificial SEI Layers for Aqueous Lithium-ion Battery Anodes

*Usha Subramanya<sup>1‡</sup>, Charleston Chua<sup>1‡</sup>, Victor Gin He Leong<sup>1</sup>, Ryan Robinson<sup>1</sup>, Gwenlyn Angel Cruz Cabiltes<sup>1</sup>, Prakirti Singh<sup>1</sup>, Bonnie Yip<sup>1</sup>, Anuja Bokare<sup>2</sup>, Folarin Erogbogbo<sup>2</sup>, and Dahyun Oh<sup>1\*</sup>*

## AUTHOR ADDRESS

<sup>1</sup>Chemical and Materials Engineering Department, Charles W. Davidson College of Engineering, San José State University, One Washington Square, San José, CA 95192-0080

<sup>2</sup>Biomedical Engineering Department, Charles W. Davidson College of Engineering, San José State University, One Washington Square, San José, CA 95192-0080

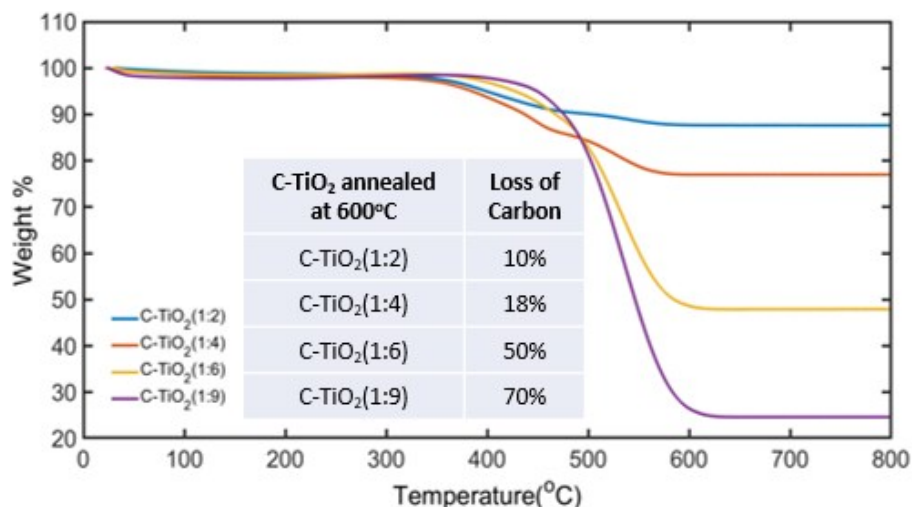

**Figure S1.** TGA of C-TiO<sub>2</sub> with different ratios of precursors (annealed at 600 °C) with a heating rate of 10 °C min<sup>-1</sup> under air.

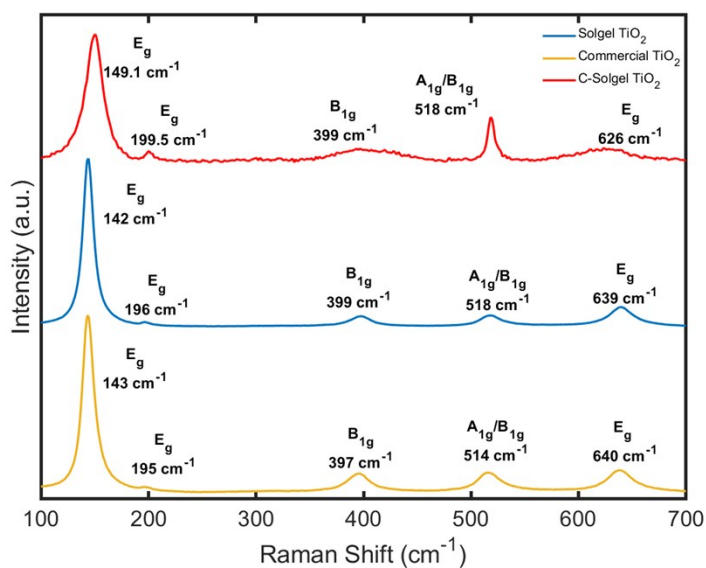

**Figure S2.** Raman spectra of commercially obtained anatase TiO<sub>2</sub> nanoparticles, sol-gel TiO<sub>2</sub> nanoparticles, and C-TiO<sub>2</sub> (synthesized with a precursor ratio of 1:4 and annealed at 600 °C). The peak shifts and relative intensities of C-TiO<sub>2</sub> are very similar to that of the anatase phase.

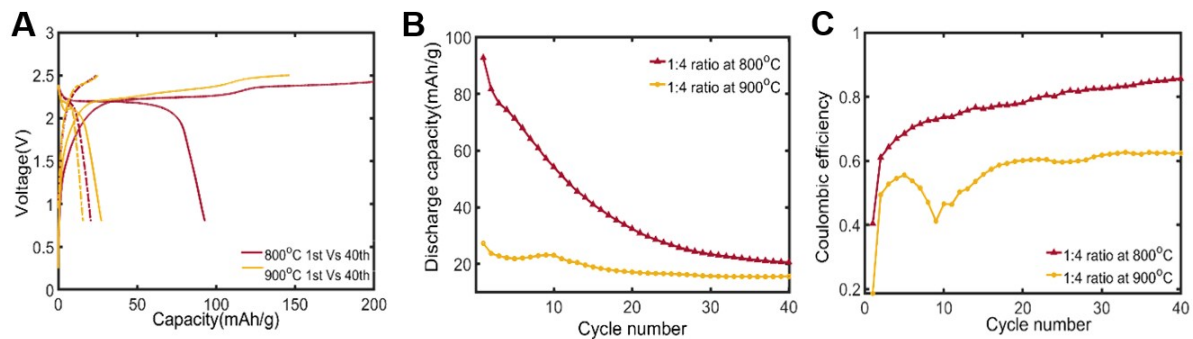

**Figure S3.** The full cell performance of C-TiO<sub>2</sub> anodes with different annealing temperature of carbon layer. The precursor ratio for TiO<sub>2</sub> synthesis was fixed as 1:4 (TiO<sub>2</sub>:glucose). (A) Voltage profiles of aqueous batteries at the 1<sup>st</sup> and 40<sup>th</sup> cycle tested with C-TiO<sub>2</sub> anodes annealed at 800 °C and 900 °C. (B) Cycling performance and (C) corresponding Coulombic efficiency of C-TiO<sub>2</sub> anodes annealed at 800 °C and 900 °C.

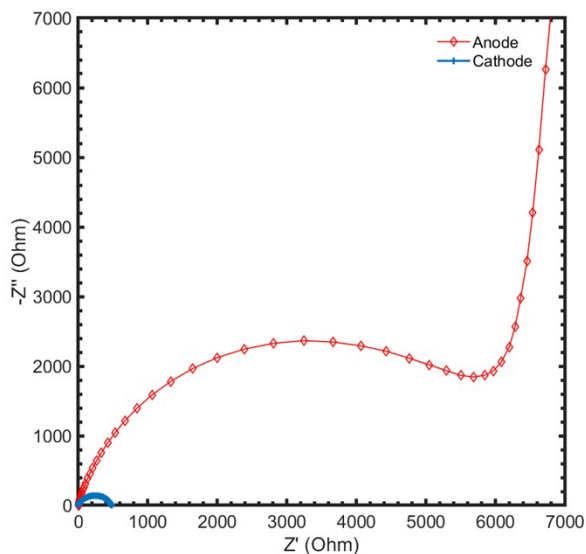

**Figure S4.** Nyquist plots from the symmetric cathode and uncoated anode cells cycled after 100 cycles. The overall impedance of the cathode is small compared to the anode, showing that the majority of the cell impedance evolution originates from the anode.

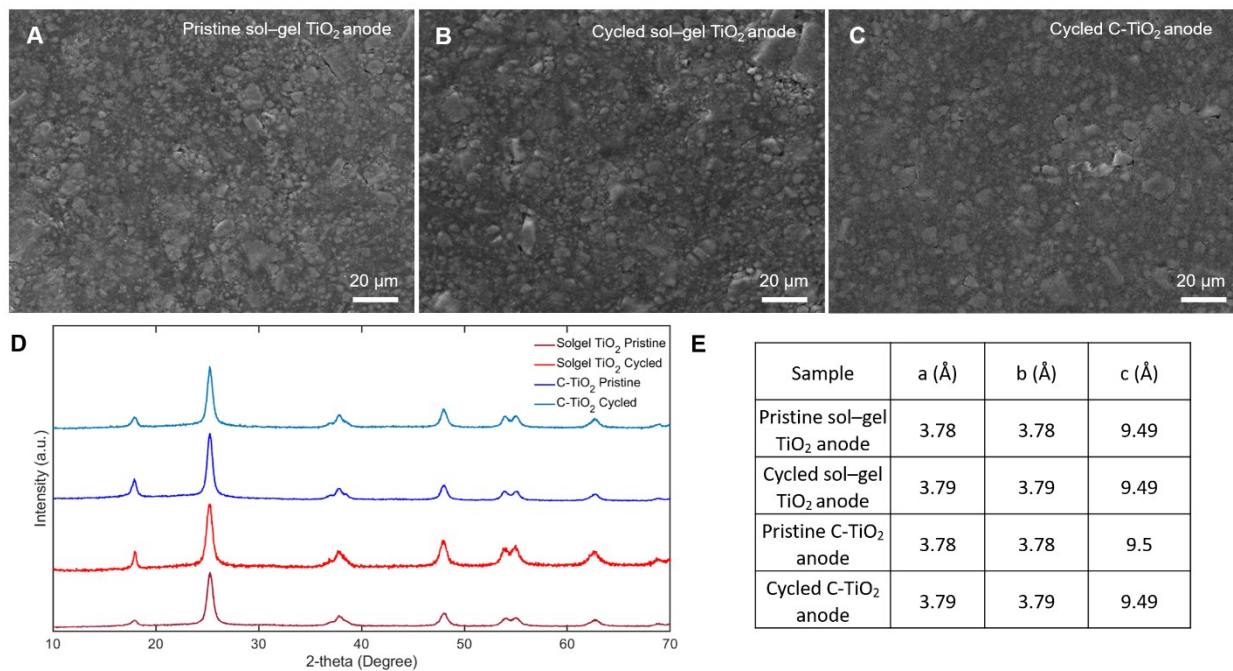

**Figure S5.** SEM images of anodes made of (A) sol-gel TiO<sub>2</sub> at the pristine state, (B) sol-gel TiO<sub>2</sub> cycled 100 times, and (C) C-TiO<sub>2</sub> (synthesized with 1:4 of precursor ratio and annealed at 600 °C) cycled 100 times. (D) XRD patterns of sol-gel TiO<sub>2</sub> and C-TiO<sub>2</sub> electrodes at their pristine states, and sol-gel TiO<sub>2</sub> and C-TiO<sub>2</sub> electrodes after cycling 60 times. (E) Lattice parameters of XRD patterns in (D).

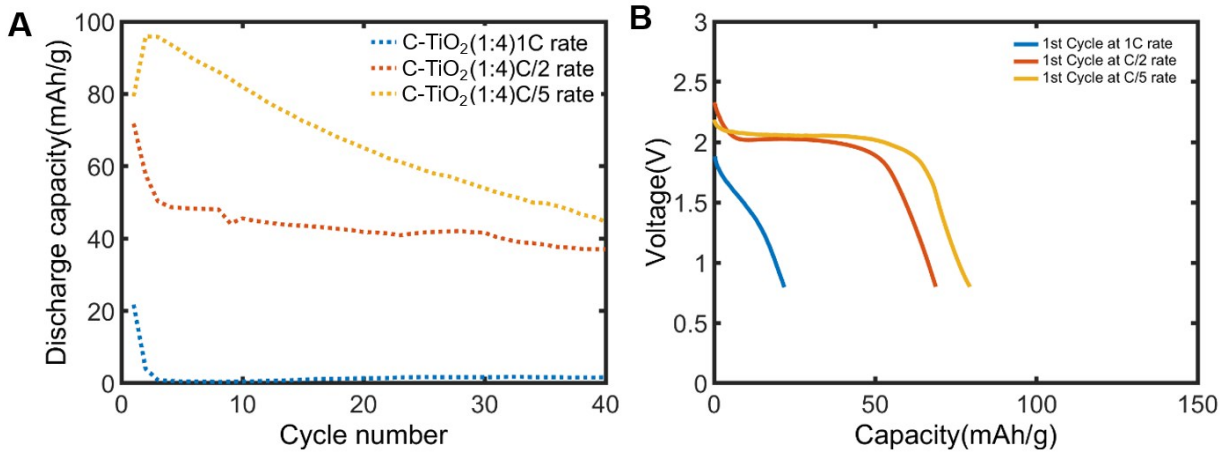

**Figure S6.** The cycling performance (A) and the first discharge voltage profile (B) of C-TiO<sub>2</sub> anodes (synthesized with 1:4 of precursor ratio and annealed at 600 °C) tested at different C rates.
